# Supplementary material for: Towards more sustainable cooking practices to increase the bioaccessibility of colourless and provitamin A carotenoids in cooked carrots
Source: Royal Society of Chemistry journal article supplement (doi:10.1039/d4fo02752c), 2024-01-01
Supplement: d4fo02752c1.pdf [file d4fo02752c1.pdf]

**Supplementary Figure 1.** Carotenoid bioaccessible content (mg carotenoids/100 g carrot serving) by the energy consumption (Kwh) in equivalent cooking treatment (A and B).

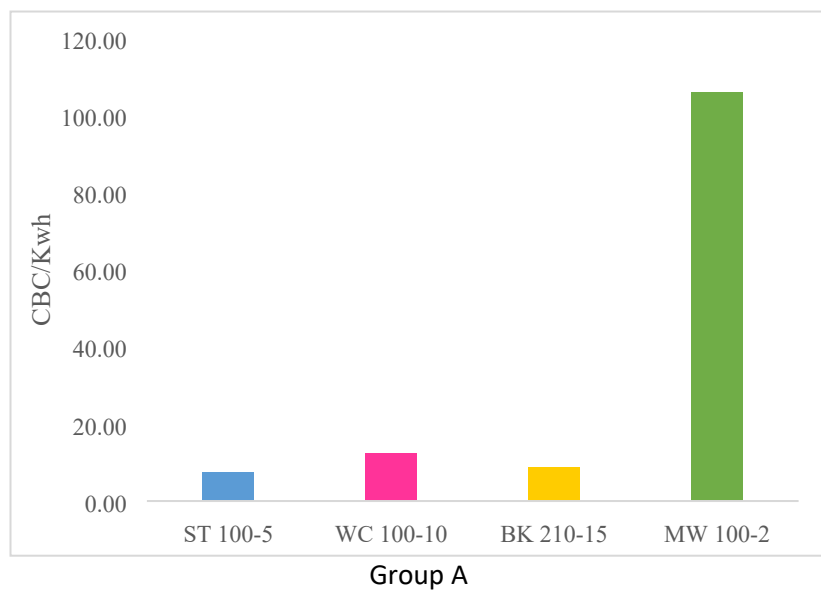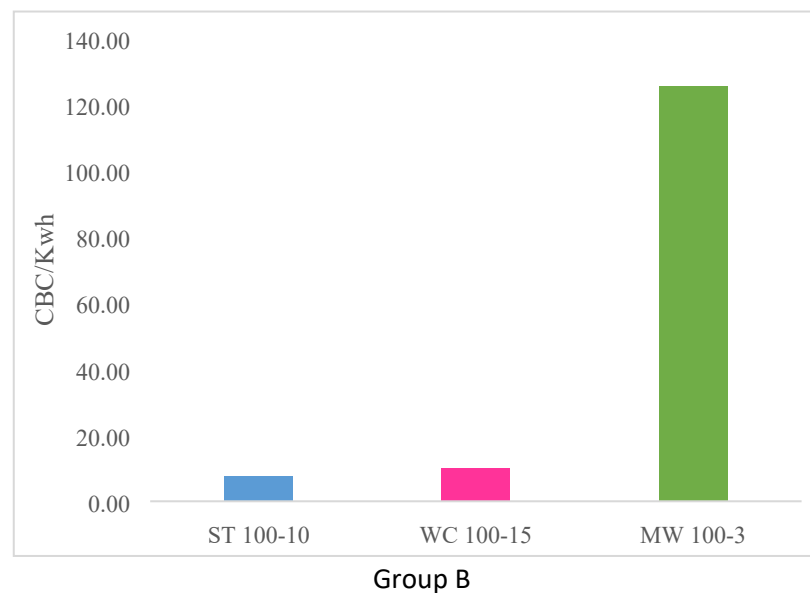

Nomenclature used for cooking process: **ST**, steaming; **WC**, water cooking; **BK**, baking; **MW**, microwaving
