# Supplementary material for: Towards more sustainable cooking practices to increase the bioaccessibility of colourless and provitamin A carotenoids in cooked carrots
Source: Royal Society of Chemistry journal article supplement (doi:10.1039/d4fo02752c), 2024-01-01
Supplement: d4fo02752c3.pdf [file d4fo02752c3.pdf]

**Supplementary table 1.** For each treatment and temperature, coefficients *a* and *b* obtained for the exponential curve fit of data of hardness (N/mm) *f(x)* and time (min) (*x*).

| Treatment         | <i>a</i> | <i>b</i> | $f(x) = a \cdot \exp(b \cdot x)$  | R-squared | RMSE |
|-------------------|----------|----------|-----------------------------------|-----------|------|
| <b>ST (100°C)</b> | 153.7    | -0.071   | $f(x)=153.7 \times e^{(-0.071X)}$ | 0.875     | 19.6 |
| <b>WC (80°C)</b>  | 142.3    | -0.004   | $f(x)=142.3 \times e^{(-0.004X)}$ | 0.093     | 17.6 |
| <b>WC (100°C)</b> | 151.4    | -0.048   | $f(x)=151.4 \times e^{(-0.048X)}$ | 0.824     | 17.4 |
| <b>BK (180°C)</b> | 145.1    | -0.026   | $f(x)=145.1 \times e^{(-0.026X)}$ | 0.567     | 19.8 |
| <b>BK (210°C)</b> | 137.3    | -0.032   | $f(x)=137.3 \times e^{(-0.032X)}$ | 0.545     | 24.2 |
| <b>MW (80%)</b>   | 147.4    | -0.226   | $f(x)=147.4 \times e^{(-0.226X)}$ | 0.586     | 22.3 |
| <b>MW (100%)</b>  | 158.1    | -0.255   | $f(x)=158.1 \times e^{(-0.255X)}$ | 0.636     | 23.9 |

Nomenclature used for cooking process: **ST (100°C)**, steaming at 100 °C; **WC (80°C)**, water cooking at 80 °C; **WC (100°C)**, water cooking at 100 °C; **BK (180°C)**, baking at 180 °C; **BK (210°C)**, baking at 210 °C; **MW (80%)**, microwaving at 600W; **MW (100%)**, microwaving at 750W.
