# Supplementary material for: Towards more sustainable cooking practices to increase the bioaccessibility of colourless and provitamin A carotenoids in cooked carrots
Source: Royal Society of Chemistry journal article supplement (doi:10.1039/d4fo02752c), 2024-01-01
Supplement: d4fo02752c4.pdf [file d4fo02752c4.pdf]

**Supplementary table 2.** Coefficients of determination  $R^2$  for the values of hardness (N/mm) and total carotenoids (coloured and uncoloured) categorised by treatment. All correlations were significant ( $p < 0.05$ ).

| Hardness (N/mm) vs | $R^2$  |
|--------------------|--------|
| Steaming (ST)      | - 0.80 |
| Water cooking (WC) | - 0.91 |
| Baking (BK)        | - 0.31 |
| Wicrowaving (MW)   | - 0.82 |
