# Supplementary figures and images for: Towards more sustainable cooking practices to increase the bioaccessibility of colourless and provitamin A carotenoids in cooked carrots
Source: Royal Society of Chemistry journal article supplement (doi:10.1039/d4fo02752c), 2024-01-01

**Supplementary Figure 2.** Schematic representations of the equipment used.

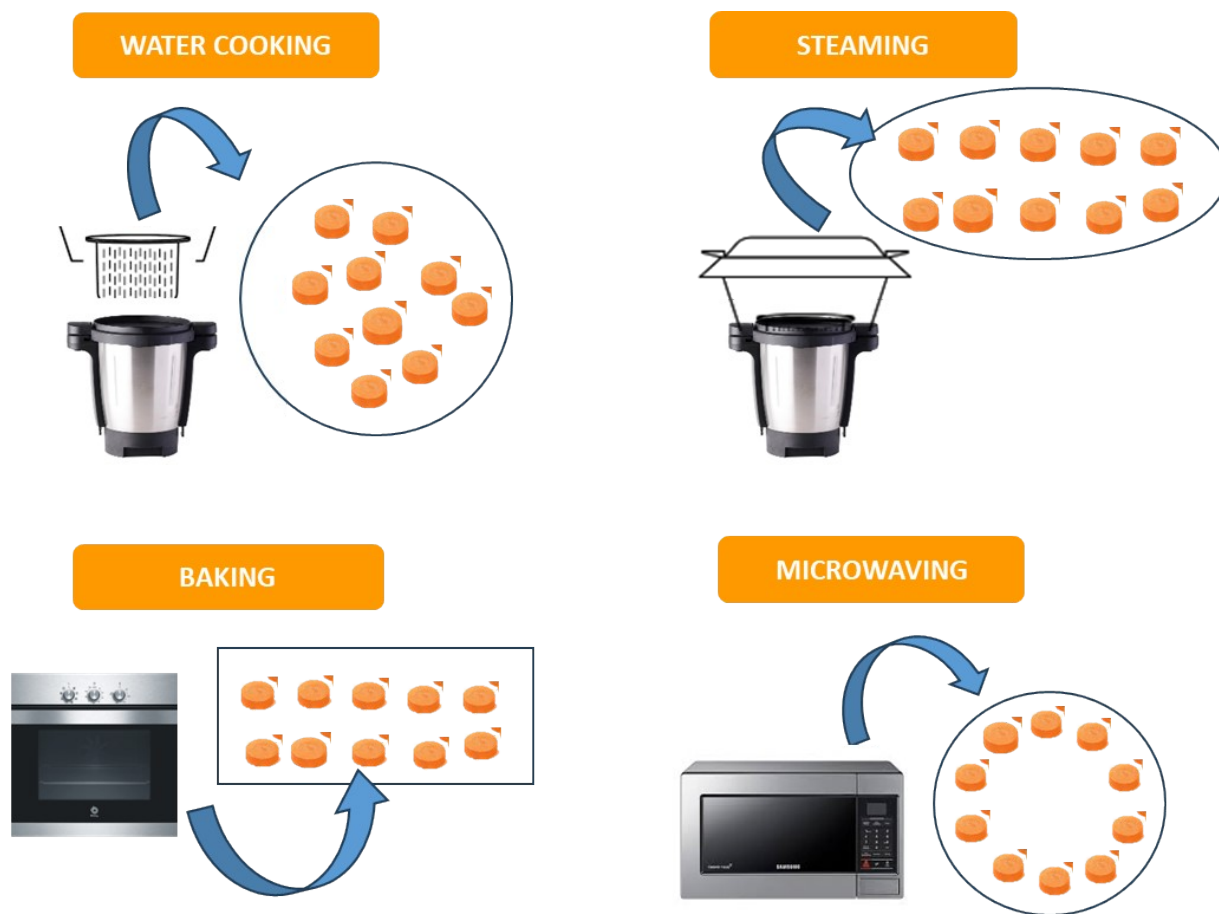

Supplement: d4fo02752c2.pdf [file d4fo02752c2.pdf]
